# Supplementary material
Source: publisher site journal article supplement (https://www.dovepress.com/article/456717)
Supplement: Supplementary file 1 [file get_supplementary_file.php]

**Supplementary Table 1** The Reagents for flow cytometric analysis of lymphocyte subsets

| <b>Specificity</b>             | <b>CD3</b> | <b>CD4</b> | <b>CD8</b> | <b>CD16</b> | <b>CD19</b> | <b>CD56</b> | <b>CD45</b> |
|--------------------------------|------------|------------|------------|-------------|-------------|-------------|-------------|
| <b>Clone number</b>            | UCHT1      | RAP-T4     | HIT8a      | CB16        | HIB19       | MEM-188     | 2D1         |
| <b>Immunoglobulin subtype</b>  | IgG1       | IgG1       | IgG1       | IgG1        | IgG1        | IgG1        | IgG1        |
| <b>Species</b>                 | Mouse      | Mouse      | Mouse      | Mouse       | Mouse       | Mouse       | Mouse       |
| <b>Fluorescence staining</b>   | FITC       | PC7        | APC-Cy7    | PE          | APC         | PE          | PerCP-Cy5.5 |
| <b>λ Excitation wavelength</b> | 488nm      | 488nm      | 633nm      | 488nm       | 633nm       | 488nm       | 48nm        |
| <b>Emission peak</b>           | 525nm      | 785nm      | 785nm      | 575nm       | 660nm       | 575nm       | 695nm       |

**Abbreviations:** FITC, Fluorescein Isothiocyanate; APC-Cy7, Allophycocyanin-Cyanine7; PE, Phycoerythrin; APC, Allophycocyanin; PerCP-Cy5.5, Peridinin-Chlorophyll-Protein -Cyanine5.5.

**Supplementary Table 2** Detailed baseline characteristics of patients

| <b>Characteristics</b>                             | <b>N</b> | <b>Percent (%)</b> |
|----------------------------------------------------|----------|--------------------|
| <b>Gender</b>                                      | 746      |                    |
| Males                                              | 520      | 69.71              |
| Females                                            | 226      | 30.29              |
| <b>Age (years)</b>                                 | 746      |                    |
| ≥60                                                | 171      | 22.92              |
| <60                                                | 575      | 77.08              |
| <b>ECOG score</b>                                  | 746      |                    |
| 0-1                                                | 699      | 93.7               |
| 2                                                  | 47       | 6.30               |
| <b>Pathology</b>                                   | 746      |                    |
| WHO type 1                                         | 184      | 24.66              |
| WHO type 2                                         | 550      | 73.73              |
| WHO type 3                                         | 12       | 1.61               |
| <b>GTV dose (Gy)</b>                               | 746      |                    |
| ≥70                                                | 657      | 88.07              |
| <70                                                | 89       | 11.93              |
| <b>Treatment model</b>                             | 746      |                    |
| RT alone                                           | 61       | 8.18               |
| CCRT                                               | 150      | 20.11              |
| NACT + RT                                          | 105      | 14.08              |
| NACT + CCRT                                        | 59       | 7.91               |
| RT + ACT                                           | 73       | 9.79               |
| CCRT + ACT                                         | 71       | 9.52               |
| NACT + RT + ACT                                    | 159      | 21.31              |
| NACT + CCRT + ACT                                  | 68       | 9.12               |
| <b>CCRT Regimen</b>                                | 348      |                    |
| Paclitaxel                                         | 94       | 27.01              |
| Platinum                                           | 230      | 66.09              |
| Nimotuzumab                                        | 24       | 6.90               |
| <b>Neoadjuvant/adjuvant Regimen</b>                | 535      |                    |
| Paclitaxel + platinum (TP)                         | 476      | 88.97              |
| Paclitaxel + platinum + fluorouracil (TPF)         | 27       | 5.05               |
| Gemcitabine + platinum (GP)                        | 26       | 4.86               |
| Platinum + fluorouracil (PF)                       | 6        | 1.12               |
| <b>Cycles of neoadjuvant/adjuvant chemotherapy</b> | 535      |                    |
| ≥4                                                 | 353      | 65.98              |
| <4                                                 | 182      | 34.02              |

(Continued)

**Supplementary Table 2 (Continued).**

| <b>Characteristics</b>                | <b>N</b> | <b>Percent (%)</b> |
|---------------------------------------|----------|--------------------|
| <b>Primary tumor (T) stage</b>        | 746      |                    |
| T0                                    | 11       | 1.47               |
| T1                                    | 74       | 9.92               |
| T2                                    | 305      | 40.88              |
| T3                                    | 207      | 27.75              |
| T4                                    | 149      | 19.97              |
| <b>Regional lymph nodes (N) stage</b> | 746      |                    |
| N0                                    | 78       | 10.46              |
| N1                                    | 264      | 35.39              |
| N2                                    | 268      | 35.92              |
| N3                                    | 136      | 18.23              |
| <b>Clinical stage</b>                 | 746      |                    |
| I                                     | 13       | 1.74               |
| II                                    | 166      | 22.25              |
| III                                   | 293      | 39.28              |
| IV                                    | 274      | 36.73              |
| <b>EBV DNA (copies/ml)</b>            | 746      |                    |
| ≥500                                  | 554      | 74.26              |
| <500                                  | 192      | 25.74              |

Abbreviations: ECOG, Eastern Cooperative Oncology Group; GTV, gross tumor volume; RT, radiotherapy; CCRT, concurrent chemoradiation; NACT, neoadjuvant chemotherapy; ACT, adjuvant chemotherapy; WHO, World Health Organization; EBV, Epstein-Barr virus.

**Supplementary Table 3** The p-values of pre- and post-propensity score matching for lymphocyte subsets in the high and low groups based on median grouping

| Baseline                                     | H vs. L(n)  | P value ( $\chi^2$ test) |        |        |        |                 |        | P value (Wilcoxon test) |          |          |        |
|----------------------------------------------|-------------|--------------------------|--------|--------|--------|-----------------|--------|-------------------------|----------|----------|--------|
|                                              |             | Male                     | NACT   | ACT    | CCRT   | EB-DNA Positive | Stage  | Age                     | GTV dose | CCRT.Num | CT.Num |
| <b>B cell</b>                                |             |                          |        |        |        |                 |        |                         |          |          |        |
| Pre-PSM                                      | 376 vs. 370 | 0.389                    | 0.342  | 0.941  | 0.597  | 0.008*          | 0.038* | 0.265                   | 0.529    | 0.594    | 0.908  |
| Post-PSM                                     | 332 vs. 322 | 0.736                    | 1.000  | 0.934  | 0.815  | 0.635           | 0.797  | 0.439                   | 0.326    | 0.859    | 0.924  |
| <b>CD4<sup>+</sup> cell</b>                  |             |                          |        |        |        |                 |        |                         |          |          |        |
| Pre-PSM                                      | 374 vs. 372 | 0.052                    | 0.213  | 0.836  | 0.122  | 0.494           | 0.033* | 0.032*                  | 0.056    | 0.065    | 0.060  |
| Post-PSM                                     | 321 vs. 321 | 1.000                    | 0.875  | 0.933  | 0.813  | 1.000           | 0.674  | 0.615                   | 0.760    | 0.772    | 0.463  |
| <b>CD8<sup>+</sup> cell</b>                  |             |                          |        |        |        |                 |        |                         |          |          |        |
| Pre-PSM                                      | 373 vs. 373 | 0.936                    | 0.107  | 0.029  | 0.660  | 0.180           | 0.066  | 0.000*                  | 0.065    | 0.713    | 0.095  |
| Post-PSM                                     | 323 vs. 323 | 0.494                    | 0.875  | 0.449  | 0.937  | 0.423           | 0.152  | 0.409                   | 0.428    | 0.880    | 0.813  |
| <b>CD4<sup>+</sup>/CD8<sup>+</sup> ratio</b> |             |                          |        |        |        |                 |        |                         |          |          |        |
| Pre-PSM                                      | 376 vs. 370 | 0.226                    | 0.999  | 0.042* | 0.411  | 0.436           | 0.136  | 0.000*                  | 0.045*   | 0.227    | 0.346  |
| Post-PSM                                     | 328 vs. 328 | 0.734                    | 1.000  | 0.619  | 0.876  | 0.937           | 0.823  | 0.560                   | 0.448    | 0.702    | 0.970  |
| <b>Total T cell</b>                          |             |                          |        |        |        |                 |        |                         |          |          |        |
| Pre-PSM                                      | 373 vs. 373 | 0.232                    | 0.019* | 0.274  | 0.883  | 0.766           | 0.142  | 0.000*                  | 0.026*   | 0.867    | 0.051  |
| Post-PSM                                     | 326 vs. 326 | 0.933                    | 0.938  | 0.933  | 0.938  | 0.936           | 0.587  | 0.400                   | 0.320    | 0.883    | 0.454  |
| <b>NK cell</b>                               |             |                          |        |        |        |                 |        |                         |          |          |        |
| Pre-PSM                                      | 374 vs. 372 | 0.000*                   | 0.421  | 0.375  | 0.023* | 0.420           | 0.012* | 0.000*                  | 0.289    | 0.067    | 0.715  |
| Post-PSM                                     | 322 vs. 322 | 0.540                    | 0.937  | 1.000  | 0.527  | 0.936           | 0.179  | 0.242                   | 0.951    | 0.610    | 0.757  |
| <b>Lymphocyte</b>                            |             |                          |        |        |        |                 |        |                         |          |          |        |
| Pre-PSM                                      | 375 vs. 371 | 0.018*                   | 0.040* | 0.096  | 0.950  | 0.440           | 0.048* | 0.119                   | 0.462    | 0.828    | 0.125  |
| Post-PSM                                     | 326 vs. 326 | 0.347                    | 0.638  | 0.800  | 0.814  | 0.873           | 0.519  | 0.515                   | 0.537    | 0.908    | 0.595  |

(Continued)

Supplementary Table 3 (Continued).

| Post-treatment                               | H vs. L(n)  | P value ( $\chi^2$ test) |        |        |        |                 |        | P value (Wilcoxon test) |          |          |        |
|----------------------------------------------|-------------|--------------------------|--------|--------|--------|-----------------|--------|-------------------------|----------|----------|--------|
|                                              |             | Male                     | NACT   | ACT    | CCRT   | EB-DNA Positive | Stage  | Age                     | GTV dose | CCRT.Num | CT.Num |
| <b>B cell</b>                                |             |                          |        |        |        |                 |        |                         |          |          |        |
| Pre-PSM                                      | 375 vs. 371 | 0.258                    | 0.001* | 0.000* | 0.000* | 0.244           | 0.008* | 0.000*                  | 0.022*   | 0.001*   | 0.000* |
| Post-PSM                                     | 273 vs. 273 | 0.924                    | 0.732  | 0.638  | 0.441  | 0.381           | 0.762  | 0.228                   | 0.549    | 0.489    | 0.573  |
| <b>CD4<sup>+</sup> cell</b>                  |             |                          |        |        |        |                 |        |                         |          |          |        |
| Pre-PSM                                      | 373 vs. 373 | 0.811                    | 0.884  | 0.435  | 0.463  | 0.551           | 0.568  | 0.026*                  | 0.268    | 0.238    | 0.727  |
| Post-PSM                                     | 351 vs. 351 | 0.869                    | 0.940  | 0.872  | 0.880  | 0.818           | 0.977  | 0.548                   | 0.484    | 0.653    | 0.945  |
| <b>CD8<sup>+</sup> cell</b>                  |             |                          |        |        |        |                 |        |                         |          |          |        |
| Pre-PSM                                      | 373 vs. 373 | 0.381                    | 0.884  | 0.012* | 0.056  | 0.456           | 0.464  | 0.566                   | 0.417    | 0.077    | 0.066  |
| Post-PSM                                     | 342 vs. 342 | 0.618                    | 0.760  | 0.290  | 0.878  | 0.641           | 0.506  | 0.569                   | 0.694    | 0.710    | 0.265  |
| <b>CD4<sup>+</sup>/CD8<sup>+</sup> ratio</b> |             |                          |        |        |        |                 |        |                         |          |          |        |
| Pre-PSM                                      | 373 vs. 373 | 0.811                    | 1.000  | 0.160  | 0.001* | 0.371           | 0.020* | 0.265                   | 0.407    | 0.001*   | 0.774  |
| Post-PSM                                     | 339 vs. 339 | 0.803                    | 0.939  | 0.806  | 0.355  | 0.938           | 0.054  | 0.707                   | 0.771    | 0.401    | 0.939  |
| <b>Total T cell</b>                          |             |                          |        |        |        |                 |        |                         |          |          |        |
| Pre-PSM                                      | 374 vs. 372 | 0.104                    | 0.421  | 0.033* | 0.946  | 0.700           | 0.073  | 0.299                   | 0.176    | 0.915    | 0.159  |
| Post-PSM                                     | 349 vs. 349 | 0.679                    | 0.820  | 0.330  | 0.939  | 1.000           | 0.032* | 0.920                   | 0.579    | 0.910    | 0.640  |
| <b>NK cell</b>                               |             |                          |        |        |        |                 |        |                         |          |          |        |
| Pre-PSM                                      | 374 vs. 372 | 0.000*                   | 0.941  | 0.916  | 0.611  | 0.258           | 0.013* | 0.000*                  | 0.996    | 0.560    | 0.194  |
| Post-PSM                                     | 311 vs. 311 | 0.377                    | 0.936  | 0.932  | 0.936  | 0.627           | 0.452  | 0.566                   | 0.555    | 0.871    | 0.961  |
| <b>Lymphocyte</b>                            |             |                          |        |        |        |                 |        |                         |          |          |        |
| Pre-PSM                                      | 373 vs. 373 | 0.001*                   | 0.884  | 0.435  | 0.660  | 0.655           | 0.588  | 0.151                   | 0.028*   | 0.482    | 0.417  |
| Post-PSM                                     | 333 vs. 333 | 0.440                    | 0.938  | 0.870  | 0.877  | 0.937           | 0.331  | 0.827                   | 0.180    | 0.882    | 0.860  |

(Continued)

Supplementary Table 3 (Continued).

| Δ values               | H vs. L(n)  | P value (χ 2 test) |       |        |        |                 |        | P value (Wilcoxon test) |          |          |        |
|------------------------|-------------|--------------------|-------|--------|--------|-----------------|--------|-------------------------|----------|----------|--------|
|                        |             | Male               | NACT  | ACT    | CCRT   | EB-DNA Positive | Stage  | Age                     | GTV dose | CCRT.Num | CT.Num |
| <b>B cell</b>          |             |                    |       |        |        |                 |        |                         |          |          |        |
| Pre-PSM                | 373 vs. 373 | 0.473              | 0.660 | 0.001* | 0.028* | 0.025*          | 0.000* | 0.774                   | 0.935    | 0.028*   | 0.008* |
| Post-PSM               | 315 vs. 315 | 0.930              | 1.000 | 0.670  | 0.873  | 1.000           | 0.516  | 0.785                   | 0.769    | 0.952    | 0.987  |
| <b>CD4+ cell</b>       |             |                    |       |        |        |                 |        |                         |          |          |        |
| Pre-PSM                | 375 vs. 371 | 0.018*             | 0.380 | 0.796  | 0.457  | 0.533           | 0.030  | 0.026                   | 0.031    | 0.411    | 0.115  |
| Post-PSM               | 319 vs. 319 | 0.795              | 0.874 | 0.799  | 1.000  | 1.000           | 0.260  | 0.928                   | 0.342    | 0.900    | 0.940  |
| <b>CD8+ cell</b>       |             |                    |       |        |        |                 |        |                         |          |          |        |
| Pre-PSM                | 374 vs. 372 | 0.278              | 0.213 | 0.000* | 0.937  | 0.834           | 0.537  | 0.000*                  | 0.001*   | 0.831    | 0.001* |
| Post-PSM               | 309 vs. 309 | 1.000              | 0.629 | 0.378  | 0.936  | 0.805           | 0.792  | 0.500                   | 0.298    | 0.975    | 0.674  |
| <b>CD4+/CD8+ ratio</b> |             |                    |       |        |        |                 |        |                         |          |          |        |
| Pre-PSM                | 370 vs. 376 | 0.226              | 0.341 | 0.000* | 0.428  | 0.574           | 0.119  | 0.000*                  | 0.011*   | 0.408    | 0.145  |
| Post-PSM               | 304 vs. 304 | 1.000              | 0.570 | 0.302  | 0.935  | 0.410           | 0.318  | 0.682                   | 0.489    | 0.953    | 0.185  |
| <b>Total T cell</b>    |             |                    |       |        |        |                 |        |                         |          |          |        |
| Pre-PSM                | 373 vs. 373 | 0.577              | 0.057 | 0.019* | 0.186  | 0.655           | 0.061  | 0.027*                  | 0.006*   | 0.182    | 0.004* |
| Post-PSM               | 332 vs. 332 | 0.866              | 1.000 | 0.867  | 0.938  | 0.634           | 0.947  | 0.632                   | 0.428    | 0.733    | 0.679  |
| <b>NK cell</b>         |             |                    |       |        |        |                 |        |                         |          |          |        |
| Pre-PSM                | 373 vs. 373 | 0.381              | 0.187 | 0.639  | 0.941  | 0.882           | 0.741  | 0.193                   | 0.129    | 0.674    | 0.502  |
| Post-PSM               | 345 vs. 345 | 0.867              | 0.170 | 1.000  | 0.446  | 0.938           | 0.902  | 0.332                   | 0.219    | 0.317    | 0.536  |
| <b>Lymphocyte</b>      |             |                    |       |        |        |                 |        |                         |          |          |        |
| Pre-PSM                | 373 vs. 373 | 0.690              | 0.305 | 0.211  | 0.941  | 0.941           | 0.198  | 0.017*                  | 0.074    | 0.950    | 0.121  |
| Post-PSM               | 335 vs. 335 | 0.933              | 0.938 | 1.000  | 1.000  | 0.753           | 0.829  | 0.836                   | 0.903    | 0.929    | 0.757  |

Note: \* P<0.05.

**Abbreviations:** H, group with above median value; L, group with below median value; NACT, neoadjuvant chemotherapy; ACT, adjuvant chemotherapy; CCRT, concurrent chemoradiation; CT, chemotherapy; EBV, Epstein-Barr virus; Num, number; PSM, propensity score matching; Δ values, differences between post-treatment and baseline counts.

**Supplementary Table 4** Part of the p-values for 5-year survival between the high and low groups after propensity score matching

|                       | <b>B cell</b> | <b>NK cell</b> | <b>Lymphocyte</b> |
|-----------------------|---------------|----------------|-------------------|
| <b>Baseline</b>       |               |                |                   |
| <b>PFS</b>            | 0.840         | 0.450          | 0.072             |
| <b>OS</b>             | 0.230         | 0.160          | 0.093             |
| <b>Post-treatment</b> |               |                |                   |
| <b>PFS</b>            | 0.620         | 0.210          | 0.840             |
| <b>OS</b>             | 0.940         | 0.980          | 0.840             |
| <b>Δ values</b>       |               |                |                   |
| <b>PFS</b>            | 0.290         | 0.460          | 0.055             |
| <b>OS</b>             | 0.520         | 0.750          | 0.460             |

**Abbreviations:** PFS, progression-free survival; OS, overall survival; Δ values, differences between post-treatment and baseline counts.
